# Supplementary material for: MicroRNA Expression Prior to Biting in a Vector Mosquito Anticipates Physiological Processes Related to Energy Utilization, Reproduction and Immunity
Source: MDPI journal article supplement (doi:10.3390/insects14080700), 2023-08-10

Supplementary Materials File for:

MicroRNA expression prior to biting in a vector mosquito anticipates physiological processes related to energy utilization, reproduction, and immunity.

Sarah Marzec, Alden Siperstein, Angela Zhou, Christina M. Holzapfel, William E. Bradshaw, Megan E. Meuti, Peter A. Armbruster\*

\*Author for correspondence: paa9@georgetown.edu

**Table S1.** List of the 144 unique mature miRNAs combined from Hong et al. (2014) and miRbase. miRNAs from Hong et al. are named additionally with position information (i.e. super contig location) and miRNAs from miRbase are labeled with identifiers from the miRbase database (“MIMAT”).

| Mature miRNA                                | Sequence                |
|---------------------------------------------|-------------------------|
| Cpp-bantam_supercont3.65:199694-199763      | TGAGGTAAGTTGGTTGTATAGT  |
| Cpp-miR-1-3p_supercont3.78:246202-246281    | TGGAATGTAAAGAAGTATGGAG  |
| Cpp-miR-2-3p-1_supercont3.366:116579-116662 | TATCACAGCCAGCTTTGAAGAG  |
| Cpp-miR-2-3p-2_supercont3.366:116853-116935 | TATCACAGCCAGCTTTGAAGAGC |
| Cpp-miR-7_supercont3.1:3357343-3357422      | TGGAAGACTAGTGATTTTGTGT  |
| Cpp-miR-8_supercont3.40:815854-815935       | TAATACTGTCAGGTAAAGATGTC |
| Cpp-miR-9_supercont3.1009:114890-114972     | TCTTTGGTTATCTAGCTGTA    |
| Cpp-miR-10-3p_supercont3.12:95990-96072     | CAAATTCGGTTCTAGAGAGGTTT |
| Cpp-miR-11-3p_supercont3.153:639659-639743  | CATCACAGTCTGAGTTCTTGCT  |
| Cpp-miR-12-3p_supercont3.153:639666-639741  | TGAGTATTACATCAGGTAAGTGT |
| Cpp-miR-13_supercont3.366:116983-117072     | TATCACAGCCATTTTGACGAGTT |
| Cpp-miR-14-3p_supercont3.676:52241-52327    | TCAGTCTTTTCTCTCTCTAT    |
| Cpp-miR-31_supercont3.559:256532-256609     | TGGCAAGATGTTGGCATAGCTGA |
| Cpp-miR-33_supercont3.1258:69328-69403      | GTGCATTGTAGTTGCATTGCA   |
| Cpp-miR-71_supercont3.366:117493-117583     | AGAAAGACATGGGTAGTGAGAT  |
| Cpp-miR-79-3p_supercont3.83:80579-80662     | TAAAGCTAGATTACCAAGCAT   |
| Cpp-miR-87_supercont3.431:379743-379819     | GTGAGCAAATTTTCAGGTGTGT  |
| Cpp-miR-92a_supercont3.722:174902-174982    | TATTGCACTTGTCCTGGCCTAT  |
| Cpp-miR-92b_supercont3.722:164904-164984    | AATTGCACTTGTCCTGGCCTGC  |
| Cpp-miR-100_supercont3.4:271404-271484      | AACCCGTAGATCCGAAGTTGTG  |
| Cpp-miR-124_supercont3.8:2074719-2074803    | TAAGGCACGCGGTGAATGCCAA  |
| Cpp-miR-125_supercont3.4:280965-281043      | TCCCTGAGACCCTAACTTGTGA  |
| Cpp-miR-133-3p_supercont3.1189:55672-55785  | TTGGTCCCCTTCAACCAGCTGT  |
| Cpp-miR-137-3p_supercont3.1714:27556-27636  | TATTGCTTGAGAATACACGTAG  |
| Cpp-miR-184-3p_supercont3.567:240302-240382 | TGGACGGAGAACTGATAAGGGC  |
| Cpp-miR-190-1_supercont3.181:347902-347986  | AGATATGTTTGATATTCTTGTTG |
| Cpp-miR-210-3p_supercont3.549:157647-157724 | CTTGTGCGTGTGACAACGGCTAT |

|                                                |                         |
|------------------------------------------------|-------------------------|
| Cpp-miR-252-1_supercont3.1787:6793-6867        | CTAAGTACTAGTGCCGCAGGAG  |
| Cpp-miR-263_supercont3.219:351799-351880       | AATGGCACTGGAAGAATTCACGG |
| Cpp-miR-275_supercont3.291:329765-329845       | TCAGGTACCTGAAGTAGCGCG   |
| Cpp-miR-276-3p-1_supercont3.136:340857-340942  | TAGGAACTTCATACCGTGCTCT  |
| Cpp-miR-277_supercont3.36:1153726-1153817      | TAAATGCACTATCTGGTACGACA |
| Cpp-miR-278-3p_supercont3.16:1026152-1026243   | TCGGTGGGACTTTCGTCCGTTT  |
| Cpp-miR-279-3p_supercont3.19:1441114-1441197   | TGACTAGATCCCACTCATTAA   |
| Cpp-miR-281-1_supercont3.1661:13247-13325      | AAGAGAGCTATCCGTCGACAGT  |
| Cpp-miR-283_supercont3.57:559440-559549        | CAATATCAGCTGGTAATTCTGGG |
| Cpp-miR-285-3p_supercont3.98:262280-262362     | TAGCACCATTGAAATCAGTAC   |
| Cpp-miR-305_supercont3.291:339122-339204       | ATTGTACTTCATCAGGTGCTC   |
| Cpp-miR-306_supercont3.83:80431-80502          | TCAGGTACTGAGTGACTCTCAG  |
| Cpp-miR-308_supercont3.98:764123-764204        | CGCGGTATATTCTTGTGGCTTG  |
| Cpp-miR-309-3p_supercont3.145:66026-66116      | TCACTGGGCATAGTTTGTGCG   |
| Cpp-miR-315_supercont3.438:61916-61999         | TTTTGATTGTTGCTCAGAAAGCC |
| Cpp-miR-316_supercont3.496:152458-152539       | TGTCTTTTTCCGCTTACTGCCG  |
| Cpp-miR-317-3p-1_supercont3.36:1133161-1133241 | TGAACACAGCTGGTGGTATCT   |
| Cpp-miR-375-1_supercont3.4:25124-25212         | TTTGTTGTTTGGCTCGAGTTA   |
| Cpp-miR-932-3p_supercont3.261:301401-301481    | TGCAAGCAATGTGGAAGTGA    |
| Cpp-miR-957-3p_supercont3.787:29537-29622      | TGAAACCGTCCAAAAGTGAAGGC |
| Cpp-miR-965-3p_supercont3.48:484122-484208     | TAAGCGTATAGCTTTTCCATT   |
| Cpp-miR-970-3p_supercont3.495:35917-36003      | TCATAAGACACACGCGGCTAT   |
| Cpp-miR-980-3p_supercont3.263:352870-352954    | TAGCTGCCTTGTGAAGGGCTTA  |
| Cpp-miR-981_supercont3.431:151310-151408       | TTCGTTGTGACGAAACCTGCA   |
| Cpp-miR-988-3p_supercont3.791:14282-14361      | CCCTTGTTGAAACCTCACGC    |
| Cpp-miR-989-3p_supercont3.315:321306-321394    | TGTGATGTGACGTAGTGGTAC   |
| Cpp-miR-993_supercont3.12:55477-55565          | TACCCTGTAGTTCCGGGCTTTT  |
| Cpp-miR-996_supercont3.19:1437000-1437085      | TGACTAGATTACATGCTCGT    |
| Cpp-miR-998_supercont3.153:639515-639597       | ACTGAATTCTCGTGGGTCTGCA  |
| Cpp-miR-999-3p_supercont3.14:96865-96948       | TGTAACTGTAAGACTGTGTCT   |
| Cpp-miR-1000_supercont3.153:102798-102891      | ATATTGTCCTGTCACAGCAGT   |
| Cpp-miR-1174_supercont3.86:865891-865964       | CTGGGTATTTTAGATCATCGGC  |
| Cpp-miR-117_supercont3.86:866106-866187        | AAGTGAGAGTAGTGGTCTCATCG |
| Cpp-miR-1889_supercont3.57:562539-562677       | TAATCTCAAATTGTAACAGTGG  |
| Cpp-miR-1890_supercont3.64:982778-982862       | TGAAATCTTTGATTAGGTCT    |
| Cpp-miR-1891_supercont3.829:180333-180418      | TGAGGAGTTAATTGCGTGTTT   |
| Cpp-miR-2941-3p-1_supercont3.5:753632-753715   | TAGTACGGCTAGAACTCCACGG  |
| Cpp-miR-2951-1_supercont3.1464:4408-4477       | GAAGAGCTCAGCACGCAGGGGTG |
| Cpp-miR-2952-3p_supercont3.5:753920-753983     | TAGTACGGCCATGACTGAGGGC  |

|                                                  |                          |
|--------------------------------------------------|--------------------------|
| Cpp-miR-iab-4_supercont3.12:681153-681228        | ACGTATACTGAATGTATCCTGA   |
| Cpp-miR-2779-1_supercont3.1527:60074-60167       | ATATCCGGCTCGAAGGACCA     |
| Cpp-miR-2796-3p_supercont3.1234:55494-55572      | GTAGGCCGGCGGAACTACTTGC   |
| Cpp-miR-2840_supercont3.830:78060-78155          | TAGGAACTGGAAGAAGAGGAGG   |
| Cpp-miR-2942_supercont3.277:323072-323166        | TATTCGAGACTTCACGAGTTAAT  |
| Cpp-miR-2944b_supercont3.145:66345-66420         | GAAGGAACTCCCGGTGTGATATA  |
| Cpp-miR-2945_supercont3.4:184409-184491          | TGACTAGAGGCAGACTCGTTTA   |
| Cpp-miR-2981_supercont3.772:7842-7925            | CCGGGCCGGCGGGCGGG        |
| Cpp-miR-3781_supercont3.1005:38090-38187         | TAAGTGATTGATCGATCGTGGAT  |
| Cpp-miR-4682_supercont3.1:1608156-1608242        | TCTGAGTTCCTGGAGCCTGGTCT  |
| Cpp-miR-4448_supercont3.461:292111-292200        | GGCTCCTTGGTCTAGGGGTA     |
| Cpp-miR-307_supercont3.16:157813-157891          | TCACAACCTCCTTGAGTGAGCGA  |
| Cpp-miR-493-3p_supercont3.147:509902-509990      | TGAAGGTCCTACTGTGTGCCAGG  |
| Cpp-miR-929-3p_supercont3.60:858168-858245       | CTCCCTAACGGAGTCAGATTG    |
| Cpp-miR-1290_supercont3.383:279453-279536        | TGGATTTTTGGATCAGAGA      |
| Cpp-novel-miR1_supercont3.64:982778-982859       | AGAGCTAATTGGAGACTTCTTG   |
| Cpp-novel-miR2-1_supercont3.360:171826-171903    | GTGTCCTGTACGGTCGCCA      |
| Cpp-novel-miR3-3p_supercont3.112:3529-3623       | GTTTGAACCTGATCCGCGGCTGA  |
| Cpp-novel-miR4_supercont3.153:639486-639575      | GTGCTTTTCGTTGGAACCTTG    |
| Cpp-novel-miR5_supercont3.316:156915-156993      | AATTAGAAATCACACAAACGTT   |
| Cpp-novel-miR6-3p_supercont3.1403:25947-26028    | TAGGGAAACAGATTGGCCAATG   |
| Cpp-novel-miR7-3p-1_supercont3.1002:30216-30294  | ACATCGCGTGTGTTGGCAT      |
| Cpp-novel-miR8-3p_supercont3.829:180337-180416   | ACACGTCCATTAACCTCTGGTAC  |
| Cpp-novel-miR9-1_supercont3.156:169435-169530    | AATCGGAATTCTAAACGGAA     |
| Cpp-novel-miR10_supercont3.329:155673-155749     | TGATCTTGATTTTGATGCTCC    |
| Cpp-novel-miR11-3p_supercont3.1328:35831-35912   | CAGTGCATGGCCAACACGGTTT   |
| Cpp-novel-miR12_supercont3.8:2074722-2074801     | GGTGTTCACTGCCGGCCTGTATG  |
| Cpp-novel-miR13supercont3.787:29538-29623        | GTTAGTTTTGGGCGGGTTTTAGT  |
| Cpp-novel-miR14-3p_supercont3.196:659156-659228  | GGCGCGAGCGTGTGTTATTC     |
| Cpp-novel-miR15_supercont3.829:126138-126232     | ATTTGTGGTATATGTGCGACGAG  |
| Cpp-novel-miR16-3p_supercont3.112:109706-109789  | AAGGAGTGGAACCTGGTCGCGGA  |
| Cpp-novel-miR17-3p_supercont3.57:559449-559540   | CGGGATTCCAACGATATCCAC    |
| Cpp-novel-miR18-3p-1_supercont3.1369:75814-75893 | TTGCAGTGATGGTCGTTTGACG   |
| Cpp-novel-miR19-3p-1_supercont3.1422:16129-16229 | CAGGAGTTGATTTGGAGGACACCA |
| Cpp-novel-miR20-1_supercont3.533:194362-194441   | TGATTGTTTAACTCGATCGTTGG  |

|                                                |                                   |
|------------------------------------------------|-----------------------------------|
| Cpp-novel-miR21-1_supercont3.1761:8353-8427    | TTGTCAGTGACGGGTAGTTAGGTT          |
| Cpp-novel-miR21-3_supercont3.207:246904-246978 | TTGTCAGTGACGGGTAGTTAGGTT          |
| cqu-miR-8-5p_MIMAT0014408                      | CATCTTACCGGGCAGCATTAGA            |
| cqu-miR-2941-2-5p_MIMAT0016971                 | TGAATTTGCTGGAGTTCTGCCGGA          |
| cqu-miR-980_MIMAT0014428                       | TAGCTGCCTAGTGAAGGGC               |
| cqu-miR-13_MIMAT0014368                        | TATCACAGCCATTTTGACGAGT            |
| cqu-miR-2941-1-5p_MIMAT0014434                 | CGTGGTGTTTAGTCGTAGTGC             |
| cqu-miR-252-3p_MIMAT0014374                    | CCTGCTGCCCAAGTGCTTATCG            |
| cqu-miR-281-3p_MIMAT0014359                    | TGTCATGGAATTGCTCTCTTT             |
| cqu-miR-2951-5p_MIMAT0014432                   | AGAGCTCAGCACGCAGGGGTGGC           |
| cqu-miR-10-5p_MIMAT0014404                     | ACCCTGTAGATCCGAATTTGTT            |
| cqu-miR-305-5p_MIMAT0014382                    | ATTGTACTTCATCAGGTGCTCT            |
| cqu-miR-998_MIMAT0014445                       | TAGCACCATGAGATTCAGC               |
| cqu-bantam-5p_MIMAT0014420                     | CCGGTTTTTCATTTTCGATCTGAC          |
| cqu-miR-315_MIMAT0014365                       | TTTTGATTGTTGCTCAGAAAGC            |
| cqu-miR-277_MIMAT0014371                       | TAAATGCACTATCTGGTACGAC            |
| cqu-miR-125-3p_MIMAT0014356                    | TCACAAGTTTTGATCTCCGGTAT           |
| cqu-miR-1889-3p_MIMAT0014441                   | CACGTTACAGATTGGGGTTTCC            |
| cqu-miR-71-3p_MIMAT0014401                     | TCTCACTACCTTGTCTTTCATG            |
| cqu-miR-988-5p_MIMAT0014362                    | TGTGTGCTTTGTGACAACGAGA            |
| cqu-miR-124_MIMAT0014360                       | TAAGGCACGCGGTGAATGC               |
| cqu-miR-1175-3p_MIMAT0014391                   | TGAGATTCTACTTCTCCGACT             |
| cqu-miR-100-3p_MIMAT0014388                    | CAAGGCCGGATATATGGGATC             |
| cqu-miR-275_MIMAT0014364                       | TCAGGTACCTGAAGTAGCGC              |
| cqu-miR-210-5p_MIMAT0014396                    | AGCTGCTGACCACTGCACAAGA            |
| cqu-miR-276-5p_MIMAT0014392                    | AGCGAGGTATAGAGTTCCT               |
| cqu-miR-9-3p_MIMAT0014381                      | TAAAGCTTTAGTACCAGAGGTC            |
| cqu-miR-12-5p_MIMAT0014394                     | AAGAATGAAAATCCTGCCCTGTCGGAT       |
| cqu-miR-2951-3p_MIMAT0014433                   | ACCCGCGTCTACCCGGTTCCGTGTACTGGAAAT |
| cqu-miR-279-5p_MIMAT0014417                    | GATGGGTGTGAATCTAGTGTTTC           |
| cqu-miR-31-3p_MIMAT0014426                     | AGCTATTCAACTTCTTGTCTAT            |
| cqu-miR-308_MIMAT0014429                       | AATCACAGGAGTATACTG                |
| cqu-miR-285-5p_MIMAT0014410                    | ACTGGCTTCCAAAGGTGAGTAGA           |
| cqu-let-7-3p_MIMAT0014367                      | CTATGCAATCCGCTAGCTTAAC            |
| cqu-bantam-3p_MIMAT0014421                     | TGAGATCATTTTGAAAGCTGA             |
| cqu-miR-9-5p_MIMAT0014380                      | TCTTTGGTATTCTAGCTGTAGA            |
| cqu-miR-79_MIMAT0014430                        | GCTTTGGCGCTTTAGCTGTATGA           |
| cqu-miR-305-3p_MIMAT0014383                    | CGGCACATGTTGGAGTACAC              |
| cqu-miR-11-5p_MIMAT0014406                     | CGAGAACTCCGGCTGTGACC              |

|                             |                            |
|-----------------------------|----------------------------|
| cqu-miR-932-5p_MIMAT0014414 | TCAATTCCGTAGTGCATTGCAG     |
| cqu-miR-317-5p_MIMAT0014384 | CGGGATACACCCTGTGCTCGCTTTGC |
| cqu-miR-8-3p_MIMAT0014409   | TAATACTGTCAGGTAAAGATGT     |
| cqu-miR-993-3p_MIMAT0014376 | GAAGCTCGTTTCTATAGAGG       |

**Table S2.** Primers used for qRT-PCR validation of differentially expressed miRNAs.

| Target miRNA  | Primer Name       | Original Species used for primer design | Qiagen Catalog Number |
|---------------|-------------------|-----------------------------------------|-----------------------|
| miR-8-5p      | dme-miR-8-5p      | <i>Drosophila melanogaster</i>          | YP02110716            |
| miR-92a       | aga-miR-92a       | <i>Anopheles gambiae</i>                | YP02109225            |
| miR-1891      | aae-miR-1891      | <i>Aedes aegypti</i>                    | YP02111773            |
| miR-2941-3p-1 | aae-miR-2941-3p-1 | <i>Aedes aegypti</i>                    | YP02101472            |
| miR-283       | cqu-miR-283       | <i>Culex quinquefasciatus</i>           | YP02107736            |
| miR-2952-3p   | cqu-miR-2952-3p   | <i>Culex quinquefasciatus</i>           | YP0211919             |
| novel-miR-1   | cpp-novel-miR-1   | <i>Culex pipiens</i>                    | YCP2151324            |
| Novel-miR-4   | cpp-novel-miR-4   | <i>Culex pipiens</i>                    | YCP2151345            |
| let-7         | aga-let-7         | <i>Anopheles gambiae</i>                | YCP0201184            |

**Table S3.** Read count summary for the six samples (three each from *Cx. p. pipiens* and *Cx. p. molestus*) at sequential steps of processing for differential expression analysis.

| Name           | Filename                   | Number of raw reads | Number of cleaned reads | Percent surviving read cleaning | Contaminant alignment rate | Size sorted reads | Counts mapped to miRNAs | Percent mapped (Size sorted/Mapped miRNA) |
|----------------|----------------------------|---------------------|-------------------------|---------------------------------|----------------------------|-------------------|-------------------------|-------------------------------------------|
| Molestus Rep 1 | M1_S4_L001_R1_001.fastq.gz | 62925125            | 51097708                | 81.20%                          | 0.49%                      | 23769110          | 19459880                | 81.87%                                    |
| Molestus Rep 2 | M2_S5_L001_R1_001.fastq.gz | 59171062            | 50303619                | 85.01%                          | 0.45%                      | 27960485          | 22117141                | 79.10%                                    |
| Molestus Rep 3 | M4_S6_L001_R1_001.fastq.gz | 80251815            | 66316405                | 82.64%                          | 0.39%                      | 36760493          | 28481455                | 77.48%                                    |
| Pipiens Rep 1  | P1_S1_L001_R1_001.fastq.gz | 48470972            | 38366161                | 79.15%                          | 0.32%                      | 15546853          | 7868115                 | 50.61%                                    |
| Pipiens Rep 2  | P2_S2_L001_R1_001.fastq.gz | 89622867            | 72875986                | 81.31%                          | 0.47%                      | 31743584          | 15543979                | 48.98%                                    |
| Pipiens Rep 3  | P3_S3_L001_R1_001.fastq.gz | 67928714            | 56724825                | 83.51%                          | 0.32%                      | 24728313          | 11227141                | 45.40%                                    |

**Table S4.** All miRNAs that were analyzed in DESeq2. Log2 fold change is written as *Cx. p. pipiens* relative to *Cx. p. molestus* (i.e., positive values are upregulated in *Cx. p. pipiens*). The *p*-value has been adjusted with a Benjamini–Hochberg false discovery rate. miRNAs from Hong et al. (2014) are named additionally with position information (i.e., super contig location) and miRNAs from miRbase are labeled with identifiers from the miRbase database (“MIMAT”).

| miRNA                                        | log2FoldChange | Adjusted p-value |
|----------------------------------------------|----------------|------------------|
| Cpp-miR-iab-4_supercont3.12:681153-681228    | -0.0148735     | 0.61508364       |
| cqu-miR-12-5p_MIMAT0014394                   | -0.0150171     | 0.6043417        |
| cqu-miR-2941-1-5p_MIMAT0014434               | -0.0158699     | 0.49056312       |
| cqu-let-7-3p_MIMAT0014367                    | -0.062678      | 0.396748         |
| cqu-miR-1175-3p_MIMAT0014391                 | -0.0201756     | 0.37671411       |
| Cpp-miR-375-1_supercont3.4:25124-25212       | 0.07059022     | 0.63586403       |
| Cpp-miR-309-3p_supercont3.145:66026-66116    | -0.1861714     | 0.14512211       |
| Cpp-miR-965-3p_supercont3.48:484122-484208   | 0.07058757     | 0.70523189       |
| Cpp-miR-33_supercont3.1258:69328-69403       | 0.00499203     | 0.94372916       |
| cqu-miR-308_MIMAT0014429                     | -0.0615975     | 0.70523189       |
| Cpp-miR-993_supercont3.12:55477-55565        | -0.0868118     | 0.6191713        |
| cqu-miR-79_MIMAT0014430                      | -0.1382208     | 0.52724362       |
| Cpp-miR-117_supercont3.86:866106-866187      | -0.123497      | 0.07407613       |
| Cpp-novel-miR13supercont3.787:29538-29623    | 0.20348454     | 0.396748         |
| Cpp-miR-1174_supercont3.86:865891-865964     | -0.0703328     | NA               |
| Cpp-novel-miR4_supercont3.153:639486-639575  | 2.3203493      | 4.71E-09         |
| cqu-miR-317-5p_MIMAT0014384                  | 0.04081528     | 0.83104214       |
| cqu-miR-279-5p_MIMAT0014417                  | 0.04191834     | 0.83104214       |
| cqu-miR-988-5p_MIMAT0014362                  | 0.25152906     | 0.32749395       |
| Cpp-miR-2952-3p_supercont3.5:753920-753983   | -3.2989007     | 4.71E-09         |
| Cpp-miR-996_supercont3.19:1437000-1437085    | 0.22072083     | 0.39485799       |
| cqu-miR-993-3p_MIMAT0014376                  | -0.0455838     | 0.82955614       |
| cqu-miR-285-5p_MIMAT0014410                  | -0.1258742     | 0.6043417        |
| Cpp-novel-miR12_supercont3.8:2074722-2074801 | 0.35721759     | 0.14792726       |
| Cpp-miR-2941-3p-1_supercont3.5:753632-753715 | -2.4020312     | 1.56E-05         |
| cqu-miR-252-3p_MIMAT0014374                  | 0.26291198     | 0.28357293       |
| Cpp-novel-miR1_supercont3.64:982778-982859   | 1.28596365     | 4.31E-11         |
| cqu-miR-980_MIMAT0014428                     | -0.5204627     | 0.07407613       |
| cqu-miR-125-3p_MIMAT0014356                  | 0.181707       | 0.396748         |
| Cpp-miR-79-3p_supercont3.83:80579-80662      | 0.02587468     | 0.8712229        |
| cqu-miR-31-3p_MIMAT0014426                   | 0.14494783     | 0.49848962       |
| cqu-miR-1889-3p_MIMAT0014441                 | 0.34248247     | 0.10467865       |

|                                                               |            |            |
|---------------------------------------------------------------|------------|------------|
| cqu-miR-9-3p_MIMAT0014381                                     | -0.1303317 | 0.5718105  |
| Cpp-miR-316_supercont3.496:152458-152539                      | 0.18713324 | 0.40059563 |
| cqu-miR-305-5p_MIMAT0014382                                   | -0.2818398 | 0.14792726 |
| Cpp-miR-988-3p_supercont3.791:14282-14361                     | 0.05736725 | 0.79445264 |
| Cpp-miR-989-3p_supercont3.315:321306-321394                   | -0.1565857 | 0.04874439 |
| cqu-miR-210-5p_MIMAT0014396                                   | -0.2851568 | 0.16081872 |
| cqu-miR-305-3p_MIMAT0014383                                   | 0.45619191 | 0.01419726 |
| cqu-miR-100-3p_MIMAT0014388                                   | 0.51417183 | 0.00196792 |
| cqu-miR-276-5p_MIMAT0014392_precursor_cqu-mir-276-1_MI0013589 | 0.41143395 | 0.07407613 |
| Cpp-miR-1890_supercont3.64:982778-982862                      | -0.1092148 | 0.58937108 |
| Cpp-miR-10-3p_supercont3.12:95990-96072                       | 0.1724042  | 0.42796907 |
| Cpp-miR-92a_supercont3.722:174902-174982                      | -0.617176  | 0.00044481 |
| cqu-miR-281-3p_MIMAT0014359                                   | -0.4604905 | 0.14248426 |
| Cpp-miR-190-1_supercont3.181:347902-347986                    | -0.0314533 | 0.8712229  |
| cqu-bantam-5p_MIMAT0014420                                    | 0.05462501 | 0.77175808 |
| cqu-miR-932-5p_MIMAT0014414                                   | -0.4389772 | 0.01777675 |
| Cpp-miR-12-3p_supercont3.153:639666-639741                    | -0.2859872 | 0.07646622 |
| cqu-miR-11-5p_MIMAT0014406                                    | 0.27364422 | 0.22390308 |
| Cpp-miR-31_supercont3.559:256532-256609                       | 0.1434023  | 0.49848962 |
| Cpp-miR-133-3p_supercont3.1189:55672-55785                    | -0.2983559 | 0.25846607 |
| Cpp-miR-281-1_supercont3.1661:13247-13325                     | -0.0929924 | 0.70523189 |
| Cpp-miR-210-3p_supercont3.549:157647-157724                   | -0.2337368 | 0.25846607 |
| Cpp-novel-miR8-3p_supercont3.829:180337-180416                | 0.1815228  | 0.4118657  |
| Cpp-miR-932-3p_supercont3.261:301401-301481                   | 0.11492599 | 0.6043417  |
| Cpp-miR-283_supercont3.57:559440-559549                       | -0.7015704 | 0.00196792 |
| Cpp-miR-315_supercont3.438:61916-61999                        | -0.0852691 | 0.70523189 |
| cqu-miR-9-5p_MIMAT0014380                                     | -0.0507126 | 0.79445264 |
| cqu-miR-276-5p_MIMAT0014392_precursor_cqu-mir-276-2_MI0013589 | -0.0668978 | 0.73124415 |
| Cpp-miR-1000_supercont3.153:102798-102891                     | -0.1095273 | 0.60342782 |
| cqu-miR-124_MIMAT0014360                                      | -0.2554452 | 0.23137843 |
| Cpp-miR-278-3p_supercont3.16:1026152-1026243                  | -0.0398239 | 0.83104214 |
| Cpp-miR-137-3p_supercont3.1714:27556-27636                    | -0.0178669 | 0.8712229  |
| cqu-miR-998_MIMAT0014445                                      | -0.0716825 | 0.66261803 |
| Cpp-miR-981_supercont3.431:151310-151408                      | 0.02574181 | 0.8712229  |
| cqu-miR-71-3p_MIMAT0014401                                    | -0.2790116 | 0.16081872 |
| Cpp-miR-71_supercont3.366:117493-117583                       | 0.23856402 | 0.17018156 |
| cqu-miR-10-5p_MIMAT0014404                                    | 0.04852141 | 0.77175808 |
| cqu-miR-8-5p_MIMAT0014408                                     | -0.6891858 | 0.00013146 |



|                                                |            |            |
|------------------------------------------------|------------|------------|
| cqu-miR-2951-5p_MIMAT0014432                   | -0.064826  | 0.77175808 |
| Cpp-miR-2951-1_supercont3.1464:4408-4477       | -0.0520302 | 0.79445264 |
| Cpp-miR-87_supercont3.431:379743-379819        | 0.20001051 | 0.396748   |
| Cpp-miR-1891_supercont3.829:180333-180418      | 0.7857169  | 0.00044481 |
| Cpp-miR-125_supercont3.4:280965-281043         | -0.215164  | 0.24996278 |
| Cpp-miR-306_supercont3.83:80431-80502          | 0.02444773 | 0.87122995 |
| cqu-miR-2951-3p_MIMAT0014433                   | -0.2087002 | 0.294092   |
| Cpp-miR-970-3p_supercont3.495:35917-36003      | 0.0548937  | 0.77175808 |
| cqu-miR-13_MIMAT0014368                        | -0.1232124 | 0.52724362 |
| cqu-miR-275_MIMAT0014364                       | -0.1253092 | 0.46808512 |
| Cpp-miR-279-3p_supercont3.19:1441114-1441197   | -0.216909  | 0.22390308 |
| Cpp-miR-2-3p-1_supercont3.366:116579-116662    | -0.1721902 | 0.39485799 |
| Cpp-miR-317-3p-1_supercont3.36:1133161-1133241 | -0.0529633 | 0.73124415 |
| Cpp-miR-957-3p_supercont3.787:29537-29622      | 0.23571302 | 0.18614261 |
| Cpp-miR-11-3p_supercont3.153:639659-639743     | 0.0477329  | 0.79445264 |
| Cpp-miR-252-1_supercont3.1787:6793-6867        | 0.10104541 | 0.62219398 |
| Cpp-miR-1889_supercont3.57:562539-562677       | -0.1062147 | 0.5718105  |
| cqu-miR-277_MIMAT0014371                       | -0.1172643 | 0.52724362 |
| Cpp-miR-100_supercont3.4:271404-271484         | 0.1383665  | 0.50749308 |
| Cpp-miR-263_supercont3.219:351799-351880       | 0.15090835 | 0.50291049 |
| cqu-bantam-3p_MIMAT0014421                     | 0.0944189  | 0.66903324 |
| cqu-miR-8-3p_MIMAT0014409                      | 0.04567819 | 0.8095424  |
| Cpp-miR-14-3p_supercont3.676:52241-52327       | 0.13546855 | 0.5718105  |
| Cpp-bantam_supercont3.65:199694-199763         | 0.48154673 | 0.00044481 |
| Cpp-miR-285-3p_supercont3.98:262280-262362     | 0.04740575 | 0.79445264 |
| Cpp-miR-184-3p_supercont3.567:240302-240382    | 0.29343489 | 0.14792726 |
| Cpp-miR-276-3p-1_supercont3.136:340857-340942  | 0.02330862 | 0.8712229  |
| Cpp-miR-999-3p_supercont3.14:96865-96948       | -0.1201188 | 0.60424963 |
| Cpp-miR-1-3p_supercont3.78:246202-246281       | -0.0824759 | 0.70523189 |
| Cpp-miR-7_supercont3.1:3357343-3357422         | 0.30763015 | 0.06410465 |

**Table S5:** Validation that miRNAs are significantly, differentially expressed in independent samples of biting *Pipiens* (positive fold change) and non-biting *Molestus* (negative fold change) when measured with either RNAseq or qRT-PCR. Cpp-miR-29252-3p was detected with qRT-PCR in 4/5 biological replicates of non-biting *Molestus*, but not in any biological replicates of biting *Pipiens*.

| miRNA           | RNA seq Results  |                  | qRT-PCR Results  |          |
|-----------------|------------------|------------------|------------------|----------|
|                 | Log2 Fold Change | Adjusted p-value | Log2 Fold Change | p-value  |
| Cpp-miR-2952-3p | -3.3091          | 3.79E-09         | *                | *        |
| Cpp-miR-2941-3p | -2.4171          | 1.08E-05         | -1.924           | 0.006892 |
| Cpp-miR-283     | -0.7057          | 0.00173          | -0.6721          | 0.0201   |
| Cpp-miR-8-5p    | -0.7008          | 7.40E-05         | -0.7158          | 0.00464  |
| Cpp-miR-92a     | -0.6245          | 0.0004123        | -0.6081          | 0.0114   |
| Cpp-miR-1891    | 0.7867           | 0.0004123        | 0.3405           | 0.1814   |
| Cpp-novel-miR-1 | 1.278            | 5.14E-11         | 1.467            | 4.47E-05 |
| Cpp-novel-miR-4 | 2.311            | 4.56E-09         | 1.782            | 0.0241   |

**Figure S1.** Principle components plot of gene expression profiles in *Cx. p. molestus* (non-biting) *Cx. p. pipiens* (biting) samples. m (red) dots = biological replicate samples of *Cx. p. molestus* (non-biting), p (aqua) dots = biological replicate samples of *Cx. p. pipiens* (biting).

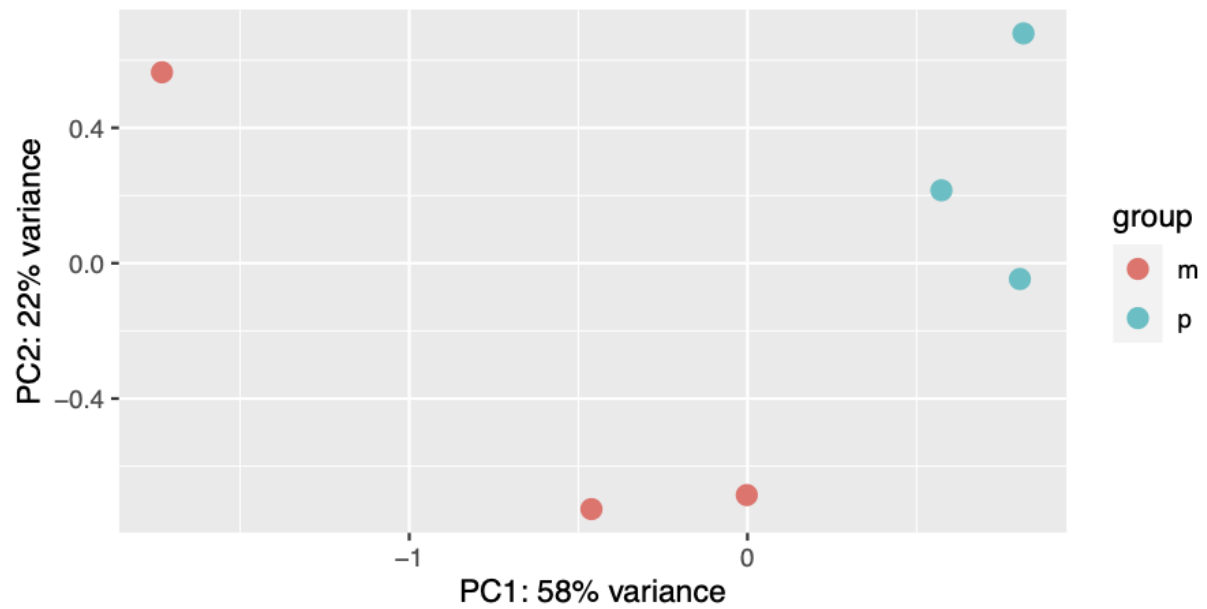

Supplement: s1 [file s1]
